# Supplementary material for: Single-cell RNA sequencing identifies CXADR as a fate determinant of the placental exchange surface
Source: PubMed Central journal article supplement (PMC11695997; doi:10.1038/s41467-024-55597-w), 2025-01-02
Supplement: 41467_2024_55597_MOESM3_ESM.pdf [file 41467_2024_55597_MOESM3_ESM.pdf]

## **Description of Additional Supplementary Files**

Supplementary Data 1 - All sequencing samples sorted by run

Supplementary Data 2 - t0 dataset\_ Number of cells per cluster resolution= 0.4, 500gpc, Harmony integrated

Supplementary Data 3 – t0 dataset markers "Findallmarkers" with l2fc>0.25

Supplementary Data 4- t0 pairwise cl0 vs cl 2 l2fc>0.25

Supplementary Data 5 – Inhibit dataset\_ Number of cells per cluster resolution= 0.8, 500gpc, Harmony integrated

Supplementary Data 6 – Remove dataset\_ Number of cells per cluster resolution= 0.8, 500gpc , Harmony integrated

Supplementary Data 7 – Inhibit dataset markers "Findallmarkers" with l2fc>0.25

Supplementary Data 8 – Remove dataset markers "Findallmarkers" with l2fc>0.25

Supplementary Data 9 – Inhibit dataset\_500g\_res.0.8\_P-val(adj) of Enriched pathways\_BioCarta\_matrix\_l2fc0.25

Supplementary Data 10 – Inhibit dataset\_500g\_res.0.8\_P-val(adj) of Enriched pathways\_GOBP\_matrix\_l2fc0.25

Supplementary Data 11- Inhibit dataset\_500g\_res.0.8\_P-val(adj) of Enriched pathways\_GOCC\_matrix\_l2fc0.25

Supplementary Data 12 – Inhibit dataset\_500g\_res.0.8\_P-val(adj) of Enriched pathways\_GOMF\_matrix\_l2fc0.25

Supplementary Data 13 – Inhibit dataset\_500g\_res.0.8\_P-val(adj) of Enriched pathways\_Kegg\_matrix\_l2fc0.25

Supplementary Data 14 – Inhibit dataset\_500g\_res.0.8\_P-val(adj) of Enriched pathways\_WP\_matrix\_l2fc0.25

Supplementary Data 15 – Remove dataset\_500g\_res.0.8\_P-val(adj) of Enriched pathways\_BioCarta\_matrix\_l2fc0.25

Supplementary Data 16 – Remove dataset\_500g\_res.0.8\_P-val(adj) of Enriched pathways\_GOBP\_matrix\_l2fc0.25

Supplementary Data 17 – Remove dataset\_500g\_res.0.8\_P-val(adj) of Enriched pathways\_GOCC\_matrix\_l2fc0.25

Supplementary Data 18 – Remove dataset\_500g\_res.0.8\_P-val(adj) of Enriched pathways\_GOMF\_matrix\_l2fc0.25

Supplementary Data 19 – Remove dataset\_500g\_res.0.8\_P-val(adj) of Enriched pathways\_Kegg\_matrix\_l2fc0.25

Supplementary Data 20 – Remove dataset\_500g\_res.0.8\_P-val(adj) of Enriched pathways\_WP\_matrix\_l2fc0.25

Supplementary Data 21 - T24 dataset\_Number of cells per cluster resolution= 0.4, 500gpc, Harmony integrated

Supplementary Data 22 - Guide RNA and primer sequences

Supplementary Data 23 – Individual Sample table

Supplementary Data 24 – R2 sample to sample correlations (Single cell to bulk)

Supplementary Data 25 – Merged Sample table

Supplementary Data 26 – Integration Methods
